# Supplementary material
Source: Springer Nature journal article supplement (https://www.springermedizin.de/resource/supplementary/13046_2013_744_MOESM2_ESM.pdf/9662840)
Supplement: MOESM2 [file 9662840]

| MSI | %    | n  |
|-----|------|----|
| Neg | 78.6 | 92 |
| Pos | 21.4 | 25 |

P<0.0001

Amsterdam Criteria NO

| MSI | %    | n  |
|-----|------|----|
| Neg | 96.1 | 74 |
| Pos | 3.9  | 3  |

Amsterdam Criteria YES

| MSI | %    | n  |
|-----|------|----|
| Neg | 45.0 | 18 |
| Pos | 55.0 | 22 |

p=0.13

Left-sided

Right-sided

| MSI | %    | n  |
|-----|------|----|
| Neg | 98.3 | 58 |
| Pos | 1.7  | 1  |

| MSI | %    | n  |
|-----|------|----|
| Neg | 88.9 | 16 |
| Pos | 11.1 | 2  |

p=0.0005

Left-sided

Right-sided

| MSI | %    | n  |
|-----|------|----|
| Neg | 73.7 | 14 |
| Pos | 26.3 | 5  |

| MSI | %    | n  |
|-----|------|----|
| Neg | 19.0 | 4  |
| Pos | 81.0 | 17 |
